# Supplementary material
Source: PubMed Central journal article supplement (PMC10704343)

## Supplemental Online Content

Silver JA, Bouganim N, Richardson K, et al. Quality of Life After Neoadjuvant Chemotherapy and Transoral Robotic Surgery for Oropharynx Cancer. *JAMA Otolaryngol Head Neck Surg*. Published online December 7, 2023.  
doi:10.1001/jamaoto.2023.3781

**eTable 1.** Treatment-related toxic effects

**eTable 2.** EORTC QLQ-HN35 symptom scales

**eFigure.** Decision regret scale

This supplemental material has been provided by the authors to give readers additional information about their work.

eTable 1. Treatment-related toxic effects

| <b>Toxicity type:</b>                                             | <b>Grade 3</b> | <b>Grade 4</b> | <b>Grade 5</b> |
|-------------------------------------------------------------------|----------------|----------------|----------------|
| Anemia                                                            | –              | –              | –              |
| Blood and lymphatic system disorders – other, specify             | –              | –              | –              |
| Febrile neutropenia                                               | –              | –              | –              |
| Tinnitus, Ototoxicity                                             | 5              | –              | –              |
| Constipation                                                      | –              | –              | –              |
| Diarrhea                                                          | 1              | –              | –              |
| Dry mouth                                                         | –              | –              | –              |
| Dysphagia                                                         | –              | –              | –              |
| Esophagitis                                                       | –              | –              | –              |
| Gastrointestinal disorders – other, specify                       | –              | –              | –              |
| Mucositis (oral)                                                  | –              | –              | –              |
| Nausea                                                            | –              | –              | –              |
| Oral hemorrhage                                                   | –              | –              | –              |
| Oral pain                                                         | –              | –              | –              |
| Vomiting                                                          | –              | –              | –              |
| Fatigue                                                           | –              | –              | –              |
| Fever                                                             | –              | –              | –              |
| Hypersensitivity reaction                                         | 1              | –              | –              |
| Pain                                                              | –              | –              | –              |
| Sepsis                                                            | –              | –              | –              |
| Skin infection                                                    | –              | –              | –              |
| Upper respiratory infection                                       | –              | –              | –              |
| Lung infection                                                    | –              | –              | –              |
| Dermatitis radiation                                              | –              | –              | –              |
| Investigations – other, specify                                   | –              | –              | –              |
| Neutrophil count decreased                                        | –              | –              | –              |
| Platelet count decreased                                          | –              | –              | –              |
| Weight loss                                                       | –              | –              | –              |
| Anorexia                                                          | –              | –              | –              |
| Dehydration                                                       | –              | –              | –              |
| Neuralgia                                                         | –              | –              | –              |
| Syncope                                                           | –              | –              | –              |
| Acute kidney injury                                               | –              | –              | –              |
| Pleural effusion                                                  | –              | –              | –              |
| Respiratory failure                                               | –              | –              | –              |
| Respiratory, thoracic, and mediastinal disorders – other, specify | –              | –              | –              |
| Sore throat                                                       | –              | –              | –              |
| Laryngeal mucositis                                               | –              | –              | –              |
| Pharyngeal mucositis                                              | –              | –              | –              |
| Hypertension                                                      | –              | –              | –              |
| Hypotension                                                       | –              | –              | –              |
| <b>TORS related</b>                                               |                |                |                |
| Post-operative hemorrhage                                         | 3              | 1              | –              |
| Chyle leak                                                        | 2              | –              | –              |
| Scar, keloid                                                      | 1              | –              | –              |
| Intraoperative hypotension                                        | 1              | –              | –              |



eTable 2. EORTC QLQ-HN35 symptom scales

|                                   | Baseline<br>(SD) [n] | 1 month<br>(SD) [n] | 3 months<br>(SD) [n] | 6 months<br>(SD) [n] | 12 months<br>(SD) [n] | 18 months<br>(SD) [n] | 24 months<br>(SD) [n] | Mean<br>difference*<br>(baseline to 24<br>months) | 95% CI             |
|-----------------------------------|----------------------|---------------------|----------------------|----------------------|-----------------------|-----------------------|-----------------------|---------------------------------------------------|--------------------|
| <b>Coughing</b>                   | 17.7<br>(25.6) [66]  | 21.7 (25.7)<br>[40] | 22.0 (26.7)<br>[59]  | 17.2 (27.1)<br>[58]  | 12.6 (20.9)<br>[53]   | 11.6 (17.5)<br>[46]   | 6.14 (15.2)<br>[38]   | -11.11                                            | [-18.71,<br>-3.48] |
| <b>Dry mouth</b>                  | 17.2<br>(24.3) [66]  | 15.8 (25.0)<br>[40] | 17.5 (22.6)<br>[59]  | 11.5 (23.3)<br>[58]  | 14.5 (27.4)<br>[53]   | 13.0 (21.6)<br>[46]   | 16.7 (27.7)<br>[38]   | -2.02                                             | [-10.86,<br>6.82]  |
| <b>Feeding<br/>tube</b>           | 0 (0) [66]           | 5.0 (22.1)<br>[40]  | 5.08 (22.2)<br>[59]  | 5.17 (22.3)<br>[58]  | 0 (0) [53]            | 0 (0) [46]            | 0 (0) [38]            | 0                                                 | -                  |
| <b>Felt ill</b>                   | 10.1<br>(22.6) [66]  | 8.55 (14.7)<br>[39] | 7.91 (15.6)<br>[59]  | 7.47 (15.3)<br>[58]  | 4.4 (11.4)<br>[53]    | 7.25 (13.9)<br>[46]   | 3.51 (10.4)<br>[38]   | -7.07                                             | [-15.82,<br>1.67]  |
| <b>Sexuality</b>                  | 23.7<br>(34.9) [64]  | 26.1 (40.8)<br>[39] | 18.6 (31.4)<br>[59]  | 17.0 (28.7)<br>[58]  | 12.9 (29.0)<br>[53]   | 5.07 (26.5)<br>[46]   | 11.8 (26.0)<br>[38]   | -15.15                                            | [-25.43,<br>-4.88] |
| <b>Nutritional<br/>supplement</b> | 19.7<br>(40.1) [66]  | 32.5 (47.4)<br>[40] | 23.7 (42.9)<br>[59]  | 15.5 (36.5)<br>[58]  | 17.0 (37.9)<br>[53]   | 13.0 (34.1)<br>[46]   | 10.5 (31.1)<br>[38]   | -15.15                                            | [-33.15,<br>2.84]  |
| <b>Mouth<br/>opening</b>          | 3.54<br>(11.9) [66]  | 25.0 (28.0)<br>[40] | 10.2 (16.7)<br>[59]  | 5.75 (16.7)<br>[58]  | 1.89 (7.78)<br>[53]   | 2.17 (8.32)<br>[46]   | 4.39 (11.4)<br>[38]   | 0                                                 | [-6.61,<br>6.61]   |
| <b>Pain</b>                       | 14.9<br>(18.9) [66]  | 26.8 (22.9)<br>[40] | 17.8 (20.2)<br>[59]  | 11.2 (14.6)<br>[58]  | 8.49 (11.8)<br>[53]   | 8.33 (14.6)<br>[46]   | 4.28 (9.34)<br>[37]   | -10.61                                            | [-17.23,<br>-3.99] |
| <b>Pain killer<br/>use</b>        | 31.8<br>(46.9) [66]  | 37.5 (49.0)<br>[40] | 28.8 (49.3)<br>[59]  | 29.3 (49.9)<br>[58]  | 18.9 (44.1)<br>[53]   | 17.4 (38.3)<br>[46]   | 13.2 (34.3)<br>[38]   | -24.24                                            | [-46.01,<br>-2.47] |
| <b>Senses<br/>problems</b>        | 6.57<br>(19.4) [66]  | 12.5 (16.3)<br>[40] | 11.6 (16.2)<br>[59]  | 12.9 (19.0)<br>[58]  | 7.86 (18.4)<br>[53]   | 1.81 (12.8)<br>[46]   | 4.82 (10.9)<br>[38]   | -6.06                                             | [-14.90,<br>2.78]  |
| <b>Speech<br/>problems</b>        | 6.82<br>(19.4) [66]  | 12.5 (16.3)<br>[40] | 11.6 (16.2)<br>[59]  | 12.9 (19.0)<br>[58]  | 7.55 (18.7)<br>[53]   | 1.81 (12.8)<br>[46]   | 4.82 (10.9)<br>[38]   | -6.57                                             | [-15.30,<br>2.17]  |
| <b>Sticky saliva</b>              | 9.09<br>(22.3) [66]  | 25.8 (30.7)<br>[40] | 15.3 (20.8)<br>[59]  | 12.9 (25.9)<br>[58]  | 11.3 (21.6)<br>[53]   | 14.5 (27.8)<br>[46]   | 15.7 (28.7)<br>[38]   | 7.07                                              | [-1.16,<br>15.30]  |
| <b>Swallowing</b>                 | 6.82<br>(14.7) [66]  | 16.9 (20.4)<br>[40] | 11.6 (15.3)<br>[59]  | 9.49 (13.7)<br>[58]  | 8.81 (16.9)<br>[53]   | 7.25 (11.6)<br>[46]   | 4.17 (7.93)<br>[38]   | -2.78                                             | [-7.98,<br>2.43]   |
| <b>Teeth</b>                      | 4.55<br>(16.4) [66]  | 4.17 (13.5)<br>[40] | 3.95 (12.5)<br>[59]  | 2.87 (9.44)<br>[58]  | 5.66 (12.6)<br>[53]   | 5.80 (12.8)<br>[46]   | 3.51 (10.4)<br>[38]   | 2.02                                              | [-3.85,<br>7.89]   |
| <b>Social<br/>contact</b>         | 4.55<br>(11.8) [66]  | 7.12 (11.8)<br>[40] | 6.1 (10.9)<br>[59]   | 5.63 (14.4)<br>[58]  | 2.77 (8.31)<br>[53]   | 2.46 (6.65)<br>[46]   | 3.38 (9.29)<br>[38]   | -1.16                                             | [-4.49,<br>2.17]   |
| <b>Social eating</b>              | 4.55<br>(13.8) [66]  | 12.3 (12.1)<br>[40] | 11.2 (14.3)<br>[59]  | 6.03 (13.8)<br>[58]  | 4.87 (12.2)<br>[53]   | 5.25 (11.3)<br>[46]   | 2.41 (6.69)<br>[38]   | -2.02                                             | [-5.41,<br>1.37]   |
| <b>Weight gain</b>                | 10.8<br>(31.2) [65]  | 30.0 (46.4)<br>[40] | 23.7 (42.9)<br>[59]  | 22.8 (42.3)<br>[57]  | 15.1 (36.1)<br>[53]   | 22.2 (42.0)<br>[45]   | 24.3 (43.5)<br>[37]   | 15.15                                             | [-2.84,<br>33.15]  |
| <b>Weight loss</b>                | 12.1<br>(32.9) [66]  | 15.0 (36.2)<br>[40] | 23.7 (42.9)<br>[59]  | 12.1 (32.9)<br>[58]  | 3.77 (19.2)<br>[53]   | 2.17 (14.7)<br>[46]   | 0 (0) [37]            | -15.15                                            | [-28.06,<br>-2.24] |

\*37 patients were included in the analyses with paired data.

eFigure. Decision regret scale

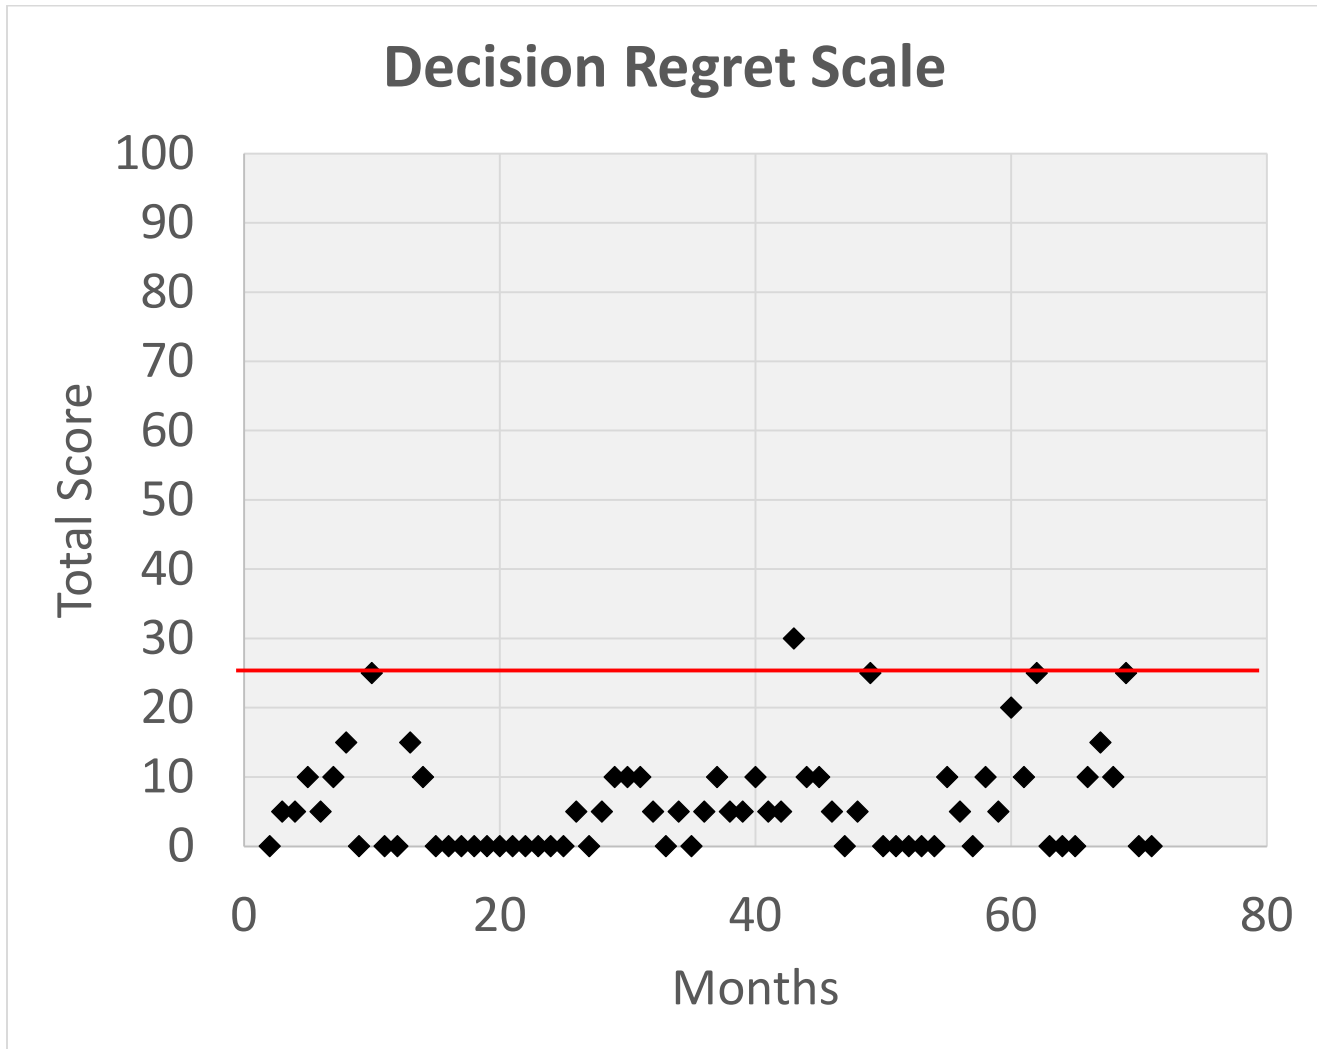

Supplement: jamaotolaryngolheadnecksurg-e233781-s001.pdf [file jamaotolaryngolheadnecksurg-e233781-s001.pdf]
