# Supplementary material
Source: PubMed Central journal article supplement (PMC10704343)
Supplement: jamaotolaryngolheadnecksurg-e233781-s002.pdf [file jamaotolaryngolheadnecksurg-e233781-s002.pdf]

## Data Sharing Statement

Silver. Quality of Life After Neoadjuvant Chemotherapy and Transoral Robotic Surgery for Oropharynx Cancer. *JAMA Otolaryngol Head Neck Surg*. Published December 07, 2023. doi:10.1001/jamaoto.2023.3781

### Data

**Data available:** Yes

**Data types:** Other (please specify)

**Additional Information:** Deidentified participant data

**How to access data:** [nader.sadeghi@mcgill.ca](mailto:nader.sadeghi@mcgill.ca)

**When available:** With publication

### Supporting Documents

**Document types:** None

### Additional Information

**Who can access the data:** Researchers whose proposed use of the data has been approved

**Types of analyses:** For any purpose

**Mechanisms of data availability:** After approval of a proposal
